# Supplementary material for: Enrofloxacin Alters Fecal Microbiota and Resistome Irrespective of Its Dose in Calves
Source: MDPI journal article supplement (doi:10.3390/microorganisms9102162), 2021-10-17
Supplement: s1 [file s1]

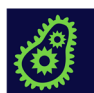

## Supplementary Materials

**Figure S1:** Ten most abundant phyla by groups (top) and sampling days (bottom, enrofloxacin was administered to the calves on day 21 right after sample collection)

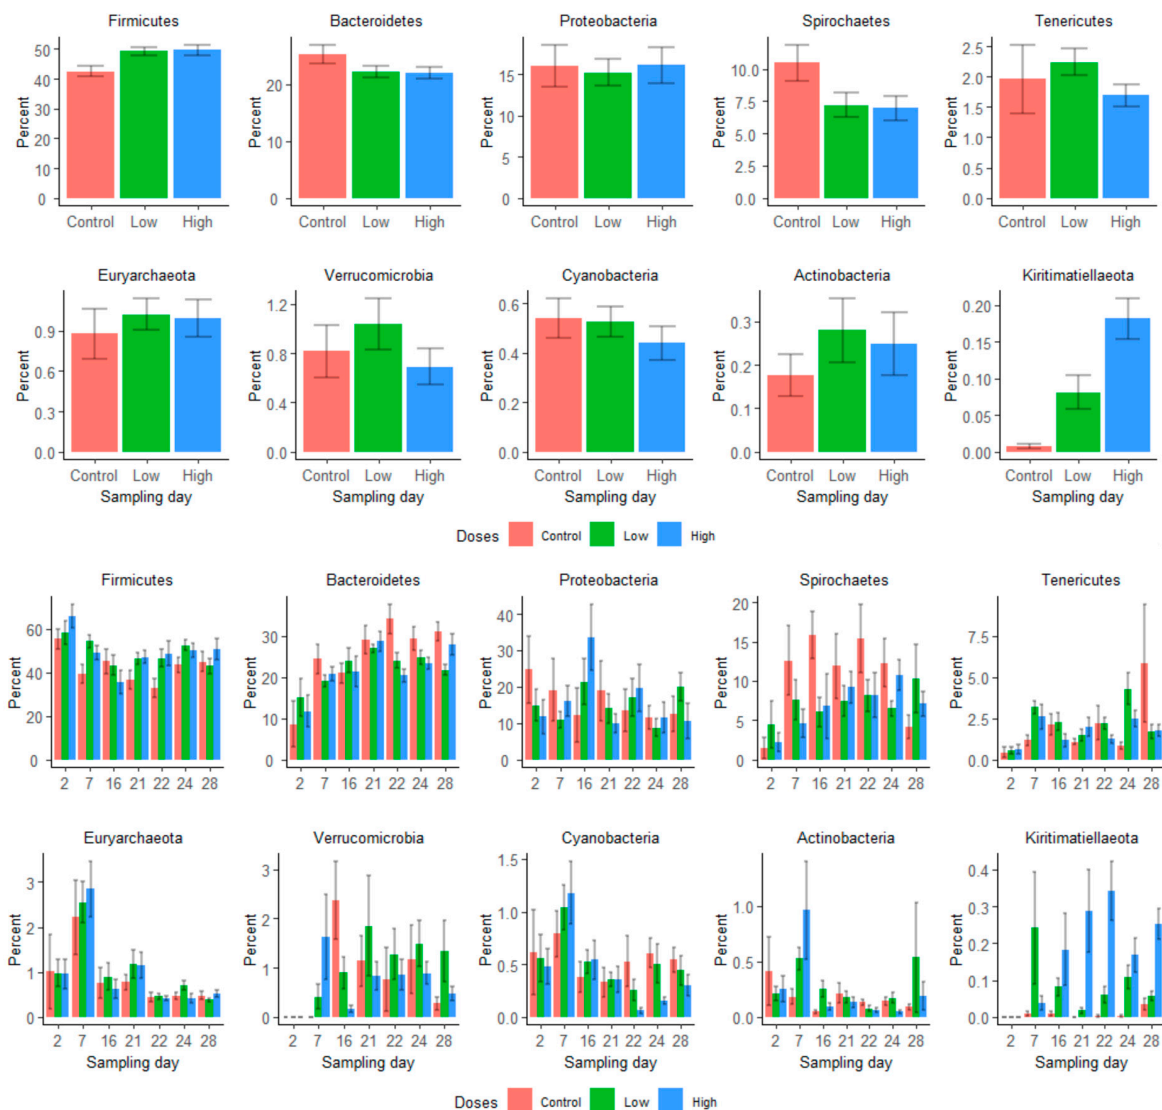

**Table S1.** Core members of fecal microbiota in beef calves ( $\geq 90\%$  samples, total = 245)

| Phylum         | Class               | Order                 | Family                        | genus                                 | Number of samples |
|----------------|---------------------|-----------------------|-------------------------------|---------------------------------------|-------------------|
| Euryarchaeota  | Methanobacteria     | Methanobacteriales    | Methanobacteriaceae           | Methanobrevibacter                    | 222               |
| Bacteroidetes  | Bacteroidia         | Bacteroidales         | Bacteroidaceae                | Bacteroides                           | 227               |
| Bacteroidetes  | Bacteroidia         | Bacteroidales         | Muribaculaceae                | uncultured                            | 220               |
| Bacteroidetes  | Bacteroidia         | Bacteroidales         | Prevotellaceae                | Alloprevotella                        | 222               |
| Bacteroidetes  | Bacteroidia         | Bacteroidales         | Prevotellaceae                | Prevotellaceae_UCG-003                | 223               |
| Bacteroidetes  | Bacteroidia         | Bacteroidales         | Rikenellaceae                 | Alistipes                             | 222               |
| Bacteroidetes  | Bacteroidia         | Bacteroidales         | Rikenellaceae                 | Rikenellaceae_RC9_gut_group           | 230               |
| Firmicutes     | Clostridia          | Clostridiales         | Clostridiaceae_1              | Clostridium_sensu_stricto_1           | 225               |
| Firmicutes     | Clostridia          | Clostridiales         | Ruminococcaceae               | uncultured                            | 220               |
| Firmicutes     | Clostridia          | Clostridiales         | Clostridiales_vadinBB60_group | uncultured                            | 225               |
| Firmicutes     | Clostridia          | Clostridiales         | Lachnospiraceae               | Unassigned                            | 243               |
| Firmicutes     | Clostridia          | Clostridiales         | Ruminococcaceae               | Ruminococcaceae_UCG-005               | 235               |
| Firmicutes     | Clostridia          | Clostridiales         | Ruminococcaceae               | Ruminococcaceae_UCG-010               | 225               |
| Firmicutes     | Clostridia          | Clostridiales         | Ruminococcaceae               | Ruminococcaceae_UCG-014               | 223               |
| Firmicutes     | Clostridia          | Clostridiales         | Ruminococcaceae               | [Eubacterium]_coprostanoligenes_group | 235               |
| Firmicutes     | Clostridia          | Clostridiales         | Ruminococcaceae               | Unassigned                            | 237               |
| Proteobacteria | Gammaproteobacteria | Betaproteobacteriales | Burkholderiaceae              | Sutterella                            | 221               |
| Spirochaetes   | Spirochaetia        | Spirochaetales        | Spirochaetaceae               | Treponema_2                           | 230               |

**Table S2:** Analysis of composition of microbiomes (ANCOM) comparing pre-and post-treatment samples at the genus level.

|    | Genus                                                                                             | Pre-treatment |      |      |      |        | Post-treatment |      |      |      |       |
|----|---------------------------------------------------------------------------------------------------|---------------|------|------|------|--------|----------------|------|------|------|-------|
|    |                                                                                                   | 0             | 25   | 50   | 75   | 100    | 0              | 25   | 50   | 75   | 100   |
| 1  | Actinobacteria;Actinobacteria;Bifidobacteriales;Bifidobacteriaceae;Bifidobacterium                | 1             | 1    | 9*   | 47   | 1057   | 1              | 1    | 1    | 1    | 703   |
| 2  | Bacteroidetes;Bacteroidia;Bacteroidales;Bacteroidaceae;Bacteroides                                | 1             | 188  | 711  | 1270 | 3832   | 65             | 731  | 1070 | 1479 | 3162  |
| 3  | Bacteroidetes;Bacteroidia;Bacteroidales;Bacteroidales_RF16_group;__                               | 1             | 1    | 1    | 1    | 2036   | 1              | 1    | 15   | 219  | 1939  |
| 4  | Bacteroidetes;Bacteroidia;Bacteroidales;Bacteroidales_RF16_group;uncultured_bacterium             | 1             | 9    | 92   | 337  | 2602   | 7              | 64   | 247  | 523  | 2623  |
| 5  | Bacteroidetes;Bacteroidia;Bacteroidales;Bacteroidales_UCG-001;uncultured_rumen_bacterium          | 1             | 1    | 1    | 1    | 38     | 1              | 1    | 1    | 5    | 560   |
| 6  | Bacteroidetes;Bacteroidia;Bacteroidales;p-251-o5;uncultured_Bacteroidales_bacterium               | 1             | 1    | 1    | 21   | 756    | 1              | 13   | 42   | 111  | 1629  |
| 7  | Bacteroidetes;Bacteroidia;Bacteroidales;Prevotellaceae;Prevotellaceae_UCG-001                     | 1             | 1    | 22   | 83   | 682    | 1              | 36   | 61   | 115  | 417   |
| 8  | Bacteroidetes;Bacteroidia;Bacteroidales;Prevotellaceae;Prevotellaceae_UCG-003                     | 1             | 28   | 151  | 391  | 1517   | 73             | 303  | 484  | 758  | 1586  |
| 9  | Bacteroidetes;Bacteroidia;Bacteroidales;uncultured;uncultured_bacterium                           | 1             | 1    | 1    | 79   | 747    | 1              | 1    | 147  | 410  | 843   |
| 10 | Bacteroidetes;Bacteroidia;Bacteroidales;uncultured;uncultured_Bacteroidales_bacterium             | 1             | 1    | 1    | 1    | 1615   | 1              | 1    | 1    | 322  | 1161  |
| 11 | Epsilonbacteraeota;Campylobacteriales;Campylobacteriales;Campylobacteraceae;Campylobacter         | 1             | 1    | 1    | 7    | 104513 | 1              | 1    | 1    | 1    | 42    |
| 12 | Firmicutes;Clostridia;Clostridiales;Clostridiales_vadinBB60_group;Ambiguous_taxa                  | 1             | 1    | 1    | 7    | 1405   | 1              | 1    | 1    | 1    | 6     |
| 13 | Firmicutes;Clostridia;Clostridiales;Lachnospiraceae;[Eubacterium]_hallii_group                    | 1             | 1    | 1    | 8    | 118    | 1              | 1    | 23   | 35   | 85    |
| 14 | Firmicutes;Clostridia;Clostridiales;Lachnospiraceae;Acetivomaculum                                | 1             | 1    | 15   | 41   | 255    | 1              | 21   | 49   | 118  | 719   |
| 15 | Firmicutes;Clostridia;Clostridiales;Lachnospiraceae;Lachnospiraceae_FCS020_group                  | 1             | 1    | 13   | 27   | 94     | 1              | 20   | 40   | 67   | 195   |
| 16 | Firmicutes;Clostridia;Clostridiales;Ruminococcaceae;Ruminococcus_1                                | 1             | 1    | 1    | 6    | 87     | 1              | 1    | 11   | 22   | 246   |
| 17 | Firmicutes;Clostridia;Clostridiales;Ruminococcaceae;Ruminococcaceae_UCG-002                       | 1             | 14   | 111  | 214  | 1478   | 1              | 146  | 301  | 524  | 1122  |
| 18 | Firmicutes;Clostridia;Clostridiales;Ruminococcaceae;Ruminococcaceae_UCG-005                       | 1             | 1010 | 2502 | 4393 | 13036  | 433            | 2666 | 4145 | 5139 | 11420 |
| 19 | Firmicutes;Clostridia;Clostridiales;Ruminococcaceae;Ruminococcaceae_UCG-010                       | 1             | 147  | 768  | 1905 | 4442   | 47             | 905  | 1991 | 2883 | 5019  |
| 20 | Kiritimatiellaeota;Kiritimatiellae;WCHB1-41;uncultured_rumen_bacterium;uncultured_rumen_bacterium | 1             | 1    | 1    | 18   | 764    | 1              | 9    | 24   | 64   | 297   |
| 21 | Proteobacteria;Alphaproteobacteria;Rhodospirillales;uncultured;__                                 | 1             | 1    | 10   | 40   | 503    | 1              | 1    | 1    | 9    | 107   |
| 22 | Proteobacteria;Alphaproteobacteria;Rhodospirillales;uncultured;uncultured_bacterium               | 1             | 1    | 12   | 50   | 1060   | 1              | 1    | 1    | 1    | 242   |
| 23 | Proteobacteria;Gammaproteobacteria;Enterobacteriales;Enterobacteriaceae;Escherichia-Shigella      | 1             | 1    | 10   | 32   | 64112  | 1              | 1    | 1    | 10   | 286   |
| 24 | Spirochaetes;Spirochaetia;Spirochaetales;Spirochaetaceae;Treponema_2                              | 1             | 74   | 444  | 2125 | 19561  | 1              | 646  | 1543 | 3347 | 15725 |
| 25 | Tenericutes;Mollicutes;Anaeroplasmatales;Anaeroplasmataceae;Anaeroplasma                          | 1             | 1    | 4    | 16   | 2974   | 1              | 7    | 20   | 64   | 3220  |
| 26 | Tenericutes;Mollicutes;EMP-G18;uncultured_bacterium;uncultured_bacterium                          | 1             | 1    | 4    | 20   | 274    | 1              | 10   | 27   | 49   | 317   |
| 27 | Tenericutes;Mollicutes;Izimaplasmatales;gut_metagenome;gut_metagenome                             | 1             | 1    | 1    | 1    | 152    | 1              | 1    | 1    | 60   | 666   |

|    |                                                                                     |   |   |   |    |          |   |   |    |         |          |
|----|-------------------------------------------------------------------------------------|---|---|---|----|----------|---|---|----|---------|----------|
| 28 | Verrucomicrobia;Verrucomicrobiae;Verrucomicrobiales;Akke<br>rmansiaceae;Akkermansia | 1 | 1 | 1 | 69 | 338<br>0 | 1 | 1 | 90 | 43<br>6 | 245<br>0 |
|----|-------------------------------------------------------------------------------------|---|---|---|----|----------|---|---|----|---------|----------|

\* 50th percentile (median) - in half of the pre-treatment samples, nine or fewer sequences were observed that were ultimately assigned *Bifidobacterium* compared to only one read assigned *Bifidobacterium* in the post-treatment samples.

**Table S3.** Reservoirs of antimicrobial resistance genes detected in pooled samples – control group

| Bacterial taxa        |                                                           | Pre-treatment                                                                                                                                          | Post-treatment                                                             |
|-----------------------|-----------------------------------------------------------|--------------------------------------------------------------------------------------------------------------------------------------------------------|----------------------------------------------------------------------------|
| Phylum                | Low level                                                 |                                                                                                                                                        |                                                                            |
| <i>Actinobacteria</i> | <i>Streptomyces mobaraensis</i> _NBRC_13819_DSM_40847     | NA*                                                                                                                                                    | tetW(1**)                                                                  |
| <i>Bacteroidetes</i>  | <i>Bacteroides salanitronis</i> _DSM_18170                | tet40(1), tetQ(1)                                                                                                                                      | NA                                                                         |
|                       | <i>Prevotella stercorea</i> _DSM_18206                    | aph2(2), aph3(4), ant6(15), ant9(2), rob(2), ermB(1), ermF(1), ermG(2), ermQ(1), mefE(442), cfr(12), tet40(10), tetBP(1), tetO(4), tetQ(440), tetW(10) | aph2(1), aph3(1), ant6(10), ant9(2), ermF(11), mefE(106), cfr(10), tetW(1) |
| <i>Firmicutes</i>     | <i>Eubacterium siraeum</i> _CAG_80                        | tet32(1), tet40(29), tetW(12)                                                                                                                          | NA                                                                         |
|                       | <i>Oscillibacter</i> _sp.                                 | aph2(2), aph3(2), mefE(1), tetQ(4), tetW(1)                                                                                                            | NA                                                                         |
|                       | <i>Streptococcus suis</i> _SS12                           | tet40(1), tetQ(3)                                                                                                                                      | NA                                                                         |
| <i>Fusobacteria</i>   | <i>Fusobacterium nucleatum</i> _subsp._vincentii_3_1_36A2 | NA                                                                                                                                                     | tetA(1), tetW(1)                                                           |
| <i>Proteobacteria</i> | <i>Rhodopseudomonas palustris</i> _DX_1                   | ermG(1), ermQ(1), mefE(1), tet40(1), tetQ(4)                                                                                                           | ant6(1)                                                                    |
| <i>Spirochaetes</i>   | <i>Treponema</i> _sp.                                     | cfr(1), tet40(8), tetW(2)                                                                                                                              | NA                                                                         |
|                       | <i>Treponema succinifaciens</i> _DSM_2489                 | NA                                                                                                                                                     | aph2(1), aph3(1), ant9(1), aci(2), cfr(22), tet40(46), tetW(13)            |

\*NA - not available, this bacterial taxon was not detected, \*\*number of hits.

**Table S4.** Reservoirs of antimicrobial resistance genes detected in pooled samples – low dose healthy group

| Bacterial taxa        |                                              | Pre-treatment                                                                                                                             | Post-treatment                                                                     |
|-----------------------|----------------------------------------------|-------------------------------------------------------------------------------------------------------------------------------------------|------------------------------------------------------------------------------------|
| Phylum                | Low-level                                    |                                                                                                                                           |                                                                                    |
| <i>Actinobacteria</i> | <i>Actinomyces_timonensis_DSM_23838</i>      | NA*                                                                                                                                       | tetW(3**)                                                                          |
|                       | <i>Bifidobacterium_pseudolongum_AGR2_145</i> | aph2(2), aph3(2), ant6(20), ant9(1), ermF(765), mefE(3), sat(2), tet40(4), tetQ(1364), tetW(9)                                            | NA                                                                                 |
|                       | <i>Streptomyces_resistomycificus</i>         | NA                                                                                                                                        | tet40(1)                                                                           |
| <i>Bacteroidetes</i>  | <i>Bacteroides_sp._CAG_927</i>               | NA                                                                                                                                        | tetQ(1)                                                                            |
|                       | <i>Prevotella_sp._CAG</i>                    | aph2(2), aph3(3), ant6(13), ant9(2), rob(1), ermF(2), ermG(2), mefE(428), cfr(17), sat(2), tet40(4), tetM(1), tetO(1), tetQ(335), tetW(6) | No ARG                                                                             |
|                       | <i>Prevotella_stercorea_DSM_18206</i>        | NA                                                                                                                                        | aph2(1), aph3(24), ant6(2), rob(24), ermG(1), mefE(83), tetQ(61), tetW(2), tetX(2) |
| <i>Firmicutes</i>     | <i>Firmicutes_bacterium_CAG_176</i>          | NA                                                                                                                                        | tetW(99)                                                                           |
|                       | <i>Blautia_producta_ATCC_27340_DSM_2950</i>  | NA                                                                                                                                        | tetO(1)                                                                            |
|                       | <i>Clostridium_sp._CAG_710</i>               | NA                                                                                                                                        | ermQ(1), tet44(1), tetO(1) tetW(1)                                                 |
|                       | <i>Eubacterium_sp._CAG_202</i>               | NA                                                                                                                                        | tetO(5)                                                                            |
|                       | <i>Paenibacillus_polymyxa_M1</i>             | NA                                                                                                                                        | tetW(1)                                                                            |
|                       | <i>Roseburia_sp._CAG_303</i>                 | NA                                                                                                                                        | tetW(1)                                                                            |
|                       | <i>Ruminococcus_sp._A254.MGS_108</i>         | NA                                                                                                                                        | tetW(7)                                                                            |
| <i>Proteobacteria</i> | <i>Enterobacter_sp._R4_368</i>               | tetQ(3)                                                                                                                                   | NA                                                                                 |
|                       | <i>Erythrobacter_litoralis_HTCC2594</i>      | NA                                                                                                                                        | tet32(2), tet40(2)                                                                 |
|                       | <i>Halomonas_sp._PBN3</i>                    | NA                                                                                                                                        | tetW(2)                                                                            |
|                       | <i>Nitrosococcus_halophilus_Nc_4</i>         | NA                                                                                                                                        | tet(15), tetW(1)                                                                   |
|                       | <i>Ralstonia_solanacearum_Po82</i>           | tet40(2), tetQ(3), tetW91)                                                                                                                | NA                                                                                 |
|                       | <i>Rhodopseudomonas_palustris_DX_1</i>       | NA                                                                                                                                        | aph3(1), rob(1), tetQ(4)                                                           |
| <i>Spirochaetes</i>   | <i>Treponema_sp._JC4</i>                     | aph2(6), aph3(6), ant6(6), aci(15), ermF(1), cfr(10), sat(6), tet40(57), tetM(1), tetO(28), tetW(122)                                     | tet40(6), tetW(3)                                                                  |
| <i>Tenericutes</i>    | <i>Mycoplasma sp.</i>                        | NA                                                                                                                                        | cfr(1), tet40(7), tetW(2)                                                          |

\*NA – not available, this bacterial taxon was not detected, \*\*number of hits.

**Table S5.** Reservoirs of antimicrobial resistance genes detected in pooled samples – high dose healthy group

| Bacterial taxa       |                                                     | Pre-treatment                                                                                                                                                                                     | Post-treatment                                                                                                                                              |
|----------------------|-----------------------------------------------------|---------------------------------------------------------------------------------------------------------------------------------------------------------------------------------------------------|-------------------------------------------------------------------------------------------------------------------------------------------------------------|
| Phylum               | Low level                                           |                                                                                                                                                                                                   |                                                                                                                                                             |
| <i>Bacteroidetes</i> | <i>Bacteroides</i> _sp._CAG_770                     | ant6(1), mefE(3), tet40(1), tetW(2)                                                                                                                                                               | NA                                                                                                                                                          |
|                      | <i>Bacteroides_coprophilus</i> _DSM_18228_JCM_13818 | aph2(12), aph3(12), ant6(27), ant9(4), ermG(2), ermQ(3), mefE(10771), cfr(25), sat(3), sulII(1), tet32(1), tet40(35), tet44(5), tetA(5), tetB(12), tetM(1), tetO(7), tetQ(577), tetW(41), tetX(1) | NA                                                                                                                                                          |
|                      | <i>Bacteroides_fragilis</i> _str._3725_D9_v_.       | ant6(1), tetW(1)                                                                                                                                                                                  | NA                                                                                                                                                          |
|                      | <i>Phocaeicola_abscessus</i> _CCUG_55929            | mefE(6), tet40(1), tetA(1), tetB(1), tetO(2), tetQ(2), tetW(1)                                                                                                                                    | NA                                                                                                                                                          |
|                      | <i>Prevotella</i> _sp._P5_119                       | NA                                                                                                                                                                                                | aph2(15), aph3(15), ant9(128), ermG(62), cfr(1), tet40(1), tetO(1), tetW(9)                                                                                 |
|                      | <i>Prevotella</i> _sp._oral_taxon_299_str._F0039    | NA                                                                                                                                                                                                | mefE(1), tet40(1), tetW(2)                                                                                                                                  |
|                      | <i>Prevotella_intermedia</i> _17                    | tetA(1), tetW(1)                                                                                                                                                                                  | NA                                                                                                                                                          |
|                      | <i>Prevotella_ruminicola</i> _23                    | NA                                                                                                                                                                                                | ant6(2), ant9(1), oxa(2), cfr(1), tet40(1), tetW(10)                                                                                                        |
|                      | <i>Prevotella_stercorea</i> _DSM_18206              | NA                                                                                                                                                                                                | aph2(3), aph3(4), ant6(10), ant9(7), rob(1), ermF(1), ermG(1), ermQ(1), mefE(506), cfr(9), sat(3), tet32(1), tet40(10), tetA(1), tetO(1), tetW(78), tetX(1) |
| <i>Chlamydia</i>     | <i>Chlamydia_pecorum</i> _PV3056_3                  | mefE(2),                                                                                                                                                                                          | NA                                                                                                                                                          |
| <i>Cyanobacteria</i> | <i>Cyanobacterium_aponinum</i> _PCC_10605           | NA                                                                                                                                                                                                | aph2(1), aph3(1), ant6(1), tet40(10), tetW(10)                                                                                                              |
| <i>Firmicutes</i>    | <i>Carboxydotherrmus_hydrogenoformans</i> _Z_2901   | aph2(4), aph3(4), ant9(2), mefE(5), tet40(3), tetB(2), tetQ(1), tetW(2)                                                                                                                           | NA                                                                                                                                                          |
|                      | <i>Clostridium</i> _sp._CAG_914                     | ant6(1), ermQ(1), mefE(9), sat(2), tet40(2), tet44(9), tetA(2), tetB(3), tetM(1), tetO(1), tetW(2)                                                                                                | NA                                                                                                                                                          |
|                      | <i>Eubacterium</i> _sp._CAG_161                     | NA                                                                                                                                                                                                | sat(1), tet40(2), tetO(2), tetW(81)                                                                                                                         |
|                      | <i>Eubacterium_ventriosum</i> _ATCC_27560           | aph2(4), aph3(4), ant6(2), ermQ(1), mefE(22), tet40(5), tet44(1), tetB(1), tetO(27), tetQ(4), tetW(5)                                                                                             | NA                                                                                                                                                          |
|                      | <i>Clostridiales</i>                                | aph2(441), aph3(441), ant6(9), ant9(18), ermB(1), ermG(2), mefE(55), sat(82), tet40(306), tetA(6), tetB(11), tetM(2), tetO(6), tetQ(7), tetW(366)                                                 | aph2(1), aph3(1), oxa(160), sat(1), tet32(2), tet40(3), tetO(5), tetW(318)                                                                                  |
|                      | <i>Ruminococcus</i> _sp._CAG_488                    | aph2(2), aph3(2), ant6(1), mefE(6), cfr(1), sat(1), floR(1), tet40(11), tetA(1), tetO(7), tetQ(1), tetW(4)                                                                                        | aph2(3), aph3(3), ant6(1), mefE(1), tet40(18), tetW(23)                                                                                                     |
|                      | <i>Subdoligranulum</i> _sp._4_3_54A2FAA             | aph2(16), aph3(16), ant6(2), mefE(13), sat(11), tet40(3), tet44(1), tetB(4), tetO(2), tetQ(2), tetW(25)                                                                                           | NA                                                                                                                                                          |
|                      | <i>Methanobrevibacter_oralis</i> _JMR01             | ant6(1), ant9(1), mefE(6), tet40(1), tet44(1), tetW(1)                                                                                                                                            | aph2(3), aph3(4), ant6(1), rob(1), tet40(6), tetO(1), tetW(26)                                                                                              |

|                        |                                                          |                                                                                                                                                                                    |                                                                                                      |
|------------------------|----------------------------------------------------------|------------------------------------------------------------------------------------------------------------------------------------------------------------------------------------|------------------------------------------------------------------------------------------------------|
|                        | <i>Methanobrevibacter_ruminantium_M1</i>                 | NA                                                                                                                                                                                 | sat(1), tet40(1), tetW(13)                                                                           |
|                        | <i>Methanobrevibacter_wolinii_SH</i>                     | mefE(10), tet40(1), tetB(2), tetM(1), tetO(1), tetW(2)                                                                                                                             | ant6(1), tetW(1)                                                                                     |
| <i>Proteobacteria</i>  | <i>Rhodopseudomonas_palustris_DX_1</i>                   | aph2(2), aph3(2), mefE(40), tet40(2), tetB(3), tetQ(13), tetW(5)                                                                                                                   | aph291, aph3(1), tetW(3)                                                                             |
|                        | <i>Rickettsia_heilongjiangensis_054</i>                  | NA                                                                                                                                                                                 | tetW(6)                                                                                              |
| <i>Spirochaetes</i>    | <i>Treponema_sp._JC4</i>                                 | NA                                                                                                                                                                                 | cfr(2), tet32(1), tet40(7), tetO(1), tetW(7)                                                         |
|                        | <i>Treponema_succinifaciens_DSM_2489</i>                 | NA                                                                                                                                                                                 | tet32(8), tet40(14), tetO(3), tetW(18)                                                               |
| <i>Tenericutes</i>     | <i>Mycoplasma sp.</i>                                    | aph2(1), aph3(1), mefE(12), cfr(19), tet40(21), tetA(1), tetB(1), tetO(2), tetW(13)                                                                                                | NA                                                                                                   |
| <i>Verrucomicrobia</i> | <i>Akkermansia_muciniphila_ATCC_BA_A_835</i>             | aph2(7), aph3(8), ant9(5), rob(1), ermB(1), ermG(1), ermQ(1), ermX(1), mefE(275), sat(7), tet32(1), tet40(39), tet44(2), tetA(12), tetB(26), tetM(2), tetO(10), tetQ(11), tetW(60) | aph2(1), aph3(1), ant6(1), ermF(1), sat(1), tet32(1), tet40(10), tetA(1), tetO(2), tetW(30), tetX(1) |
| <i>Other</i>           | <i>Candidatus_Liberibacter_americanus_str._Sao_Paulo</i> | mefE(5), tet40(2), tetO(1)                                                                                                                                                         | NA                                                                                                   |

\*number of hits



**Table S6.** Reservoirs of antimicrobial resistance genes detected in pooled samples – high dose sick group

| Bacterial taxa |                                                              | Pre-treatment                                                                               | Post-treatment                                                                                                                                                  |
|----------------|--------------------------------------------------------------|---------------------------------------------------------------------------------------------|-----------------------------------------------------------------------------------------------------------------------------------------------------------------|
| Phylum         | Low level                                                    |                                                                                             |                                                                                                                                                                 |
| Actinobacteria | <i>Corynebacterium_nuruki_S6_4</i>                           | cfr(2), tetO(2), tetW(7)                                                                    | ermQ(1), mefE(6), tetW(2)                                                                                                                                       |
| Bifidobacteria | <i>Bifidobacterium_pseudolongum_subsp_globosum_DSM_20092</i> | NA                                                                                          | ant6(1), cmX(4), ermQ(1), ermX(2), mefE(4), sat(1), tet40(1), tetA(1), tetQ(1), tetW(1)                                                                         |
| Bacteroidetes  | <i>Bacteroides_sp.</i>                                       | aph2(1), aph3(1), ant6(5), cfrX(2), mefE(1748), cfr(3), sat(1), tet40(1), tetQ(13), tetW(1) | aph2(1), aph3(1), tet40(1), tetM(2), tetQ(1)                                                                                                                    |
|                | <i>Prevotella_sp._CAG_5226.fna</i>                           | NA                                                                                          | mefE(1), tetO(1)                                                                                                                                                |
|                | <i>Prevotella_scopos_JCM_17725.fna</i>                       | NA                                                                                          | aph2(1), aph3(1), ant6(1), ant9(1), mefE(6), tet40(3), tetA(1), tetQ(6), tetW(2)                                                                                |
|                | <i>Prevotella_stercorea_DSM_18206</i>                        | NA                                                                                          | aph2(5), aph3(5), ant6(18), ant9(16), cmX(3), ermG(1), ermQ(6), mefE(4606), cfr(12), sat(1), tet40(20), tetA(7), tetB(1), tetM(1), tetO(3), tetQ(391), tetW(49) |
|                | <i>Subdoligranulum_sp._4_3_54A2FAA</i>                       | aph2(5), aph3(5), ant6(2), sat(5), tet40(1), tetW(4)                                        | NA                                                                                                                                                              |
| Firmicutes     | <i>Bacillus_megaterium_QM_B1551</i>                          | NA                                                                                          | mefE(4), tet40(2), tetO(7), tetQ(1), tetW(5)                                                                                                                    |
|                | <i>Butyrivibrio_proteoclasticus_B316</i>                     | NA                                                                                          | aph2(1), mefE(1)                                                                                                                                                |
|                | <i>Clostridium_sp._CAG_710.fna</i>                           | tetO(21)                                                                                    | ant6(3), mefE(1), tetW(3)                                                                                                                                       |
|                | <i>Clostridium_aminophilum_DSM_10710</i>                     | NA                                                                                          | mefE(2), tet40(12), tetQ(1), tetW(3)                                                                                                                            |
|                | <i>Eubacterium_rectale_ATCC_33656</i>                        | NA                                                                                          | mefE(3), tet40(3), tetA(1)                                                                                                                                      |
|                | <i>Geomicrobium_sp._JCM_19055</i>                            | NA                                                                                          | tetW(5)                                                                                                                                                         |
|                | <i>Streptococcus_pneumoniae_ST556</i>                        | NA                                                                                          | mefE(2), tetO(3), tetW(14)                                                                                                                                      |
|                | <i>Streptococcus_pyogenes_MGAS1882</i>                       | NA                                                                                          | aph2(5), aph3(3), mefE(1), tet40(16)                                                                                                                            |
|                | <i>Streptococcus_suis_D9</i>                                 | NA                                                                                          | ermQ(1), mefE(1), tetW(3)                                                                                                                                       |
|                | <i>Subdoligranulum_sp._4_3_54A2FAA</i>                       | aph2(5), aph3(5), ant6(2), sat(5), tet40(1), tetW(4)                                        | NA                                                                                                                                                              |
| Nitrospirae    | <i>Thermodesulfovibrio_yellowstonii_DSM_11347</i>            | NA                                                                                          | mefE(1), tet40(2), tetW(1)                                                                                                                                      |
| Proteobacteria | <i>Arcobacter_butzi_7h1h</i>                                 | NA                                                                                          | ermF(1), mefE(1), tet40(4), tetX(1)                                                                                                                             |
|                | <i>Erythrobacter_litoralis_HTCC2594</i>                      | NA                                                                                          | ant6(2), ant9(2), mefE(1), tet40(1), tetW(1)                                                                                                                    |
| Spirochaetes   | <i>Treponema_succinifaciens_DSM_2489</i>                     | NA                                                                                          | aci(1), ermQ(1), mefE(4), cfr(16), tet40(27), tet44(1), tetQ(1), tetW(16)                                                                                       |

\*number of hits
